# Supplementary material
Source: publisher figshare collection journal article supplement (https://gsajournals.figshare.com/ndownloader/files/14414972)
Supplement: Supplementary file 1 [file 14414972]

## Sheet: File S5RNAi
Table S5. Genes studied in RNAi knockdown experiments, the quantiles of maximum correlations out of 580 random comparisons, and the angles between effect vectors and the first 5 PCS of the combined data set.
RNAi stocks							Quantiles, maximum random correlations						Correlation of dictionary vector with genetic PCs
Gene	Stock number	vector	expts.		Effect size		0.5	0.9	0.95	0.99	0.999		PC1	PC2	PC3	PC4	PC5
Bx	B29454	VALIUM10	1		1.1999		0.881	0.904	0.914	0.925	0.925		0.2	0.83	0.2	0.29	0.05
CG12934	V107731	KK	1		1.9159		0.707	0.757	0.769	0.795	0.795		0.35	0.21	0.02	0.25	0.4
CG14147	V107781	KK	1		0.3374		0.698	0.731	0.738	0.746	0.766		0.55	0.18	0.24	0.12	0.04
CG33299	V101048	KK	1		0.2309		0.639	0.679	0.696	0.722	0.733		0.12	0.4	0.25	0.04	0.13
CG34394	V104874	KK	1		2.1385		0.757	0.809	0.827	0.831	0.834		0.47	0.1	0.1	0.25	0.48
CG4267	B32332	VALIUM20	1		0.4521		0.783	0.821	0.836	0.87	0.87		0.34	0.23	0.51	0.34	0.33
CG8654	V100112	KK	1		0.4142		0.714	0.746	0.75	0.764	0.764		0.63	0.1	0.2	0.08	0.1
CycE	V110204	KK	1		0.9349		0.883	0.911	0.919	0.924	0.943		0.06	0.47	0.74	0.25	0.09
Dad	V42840, B26235	GD, VALIUM10	1		0.3276		0.84	0.872	0.883	0.889	0.889		0.6	0.35	0.36	0.11	0.33
Dll	V101750, B29337	KK, VALIUM10	2		0.8412		0.867	0.893	0.901	0.913	0.913		0.22	0.84	0.07	0.09	0.13
DppIII	V106199	KK	1		0.4649		0.866	0.889	0.898	0.911	0.911		0.44	0.75	0.19	0.01	0.02
Dys	V106578	KK	1		0.3208		0.603	0.648	0.666	0.7	0.703		0.3	0.15	0	0.26	0.17
Egfr	V107130, B25781	KK, VALIUM10	1		0.9394		0.821	0.849	0.857	0.871	0.902		0.7	0.16	0.09	0.25	0.03
InR	B31594	VALIUM1	1		0.5695		0.755	0.799	0.822	0.834	0.834		0.32	0.49	0.12	0.08	0.29
LIMK1	B42576	VALIUM20	1		0.4325		0.683	0.743	0.748	0.782	0.782		0.03	0.2	0.47	0.05	0.21
MPK2	B27316	VALIUM10	1		0.4463		0.825	0.855	0.862	0.875	0.875		0.18	0.68	0.09	0.37	0.15
MRP	V105419	KK	1		0.4417		0.669	0.712	0.733	0.784	0.784		0.36	0.11	0.15	0.49	0.18
Mad	B35648	VALIUM21	1		0.5446		0.879	0.898	0.904	0.916	0.927		0.84	0.08	0.2	0.2	0.07
Med	B31928	VALIUM10	1		0.768		0.812	0.84	0.847	0.849	0.863		0.17	0.63	0.24	0.37	0.19
Mer	V7161, B28007	GD, VALIUM10	1		0.5311		0.77	0.808	0.821	0.84	0.853		0.55	0.22	0.26	0.44	0.25
Poc1	V108219	KK	1		0.4028		0.764	0.8	0.812	0.834	0.834		0.34	0.49	0.08	0.28	0.08
Porin2	B25886	VALIUM10	1		0.3654		0.644	0.701	0.715	0.772	0.772		0.33	0.08	0.08	0.17	0.4
RPT1	V17176	GD	1		0.264		0.742	0.774	0.783	0.812	0.815		0.04	0.25	0.66	0.15	0.07
RhoGEF64C	V105252	KK	1		1.6637		0.702	0.75	0.768	0.789	0.797		0.34	0.17	0.06	0.37	0.36
S6k	B42572	VALIUM20	1		0.3905		0.761	0.804	0.83	0.845	0.845		0.41	0.16	0.42	0.15	0.43
SRm160	B36578	VALIUM22	1		0.8081		0.536	0.601	0.618	0.643	0.643		0.06	0.02	0.04	0.03	0.29
Ser	B34700	VALIUM20	1		0.4217		0.855	0.884	0.891	0.899	0.899		0.11	0.78	0.3	0.27	0.16
Socs36E	B35036	VALIUM20	1		0.4292		0.865	0.885	0.886	0.888	0.908		0.74	0.08	0.47	0.09	0.11
Stat92e	B33637	VALIUM20	1		0.6808		0.884	0.909	0.915	0.933	0.933		0.19	0.64	0.57	0.14	0.2
Tango14	V108341	KK	1		1.4426		0.881	0.91	0.918	0.93	0.93		0.87	0.17	0.08	0.09	0.3
Ubx	B34993	VALIUM20	1		0.6049		0.896	0.917	0.921	0.934	0.948		0.45	0.7	0.38	0.06	0.15
Vang	B34354	VALIUM20	1		0.3247		0.739	0.782	0.794	0.818	0.822		0.2	0.01	0.23	0.3	0.66
ap	B26748	VALIUM10	1		0.394		0.826	0.851	0.857	0.889	0.889		0.13	0.81	0.11	0.15	0.22
bat	V102076	KK	1		0.4889		0.62	0.674	0.694	0.716	0.716		0.19	0.01	0.45	0.02	0.07
bi	B28341	VALIUM10	1		0.3281		0.508	0.547	0.58	0.599	0.616		0.36	0.18	0.15	0.11	0.01
brk	V101887	KK	2		2.1159		0.897	0.918	0.922	0.929	0.942		0.23	0.77	0.25	0.5	0.11
bru1	V107459	KK	1		0.4688		0.813	0.838	0.851	0.858	0.871		0.66	0.06	0.37	0.12	0
bs	B26755	VALIUM10	1		0.4761		0.7	0.739	0.747	0.76	0.76		0.13	0.12	0.59	0.11	0.19
bsk	B32977	VALIUM20	1		0.6289		0.713	0.747	0.755	0.791	0.791		0.12	0.05	0.62	0.23	0.07
btd	V106976	KK	1		0.5246		0.865	0.889	0.893	0.906	0.925		0.83	0.17	0.22	0.01	0.09
bun	B28322	VALIUM10	1		0.7822		0.856	0.883	0.892	0.92	0.925		0.18	0.78	0.06	0.17	0.19
caup	V2931	GD	1		0.3834		0.7	0.742	0.748	0.77	0.77		0.39	0.27	0.36	0.28	0.08
chn	B26779	VALIUM10	1		0.9439		0.791	0.823	0.826	0.847	0.881		0.57	0.17	0.13	0.45	0.34
cv-2	B37514	VALIUM20	1		0.5685		0.842	0.87	0.873	0.886	0.886		0.56	0.49	0.08	0.38	0.25
d	B27664, B33754	VALIUM10, VALIUM20	2		0.2325		0.685	0.719	0.73	0.789	0.789		0.16	0.46	0.09	0.05	0.56
dally	B28747	VALIUM10	1		0.8955		0.879	0.906	0.912	0.933	0.933		0.64	0.29	0.47	0.31	0.12
dco	B27719	VALIUM10	1		0.6512		0.803	0.836	0.849	0.86	0.874		0.23	0.23	0.11	0.84	0.13
dgo	B35040	VALIUM20	1		0.4284		0.778	0.808	0.817	0.856	0.856		0.31	0.6	0.04	0.22	0.16
dlp	B34091	VALIUM20	1		0.9958		0.805	0.844	0.859	0.871	0.879		0.22	0.56	0.21	0.39	0.18
ds	V36219, B28008	GD, VALIUM10	2		5.7655		0.915	0.935	0.939	0.948	0.949		0.39	0.84	0.12	0.23	0.09
dsh	B31307	VALIUM1	1		1.1394		0.89	0.912	0.917	0.943	0.943		0.68	0.51	0.24	0.14	0.1
emc	V100587, B26738	KK, VALIUM10	1		0.3552		0.77	0.805	0.812	0.848	0.864		0.54	0.06	0.44	0.37	0.03
en	V35697, B26752	GD, VALIUM10	1		0.7048		0.719	0.76	0.788	0.816	0.816		0.37	0.07	0.27	0.41	0.01
ex	V109281, B28703	KK, VALIUM10	1		5.4462		0.896	0.921	0.925	0.929	0.929		0.04	0.82	0.43	0.12	0.04
fj	V28009; V34323	VALIUM10 & VALIUM20	2		2.0627		0.916	0.936	0.943	0.954	0.954		0.84	0.35	0.16	0.16	0.06
foxo	B32993	VALIUM20	1		0.2659		0.717	0.75	0.757	0.771	0.771		0.34	0.29	0.45	0.29	0
ft	V108863, B34970	KK, VALIUM20	2		4.3023		0.899	0.922	0.937	0.945	0.945		0.39	0.75	0.08	0.35	0.1
fz	B34321	VALIUM20	1		0.4509		0.815	0.842	0.851	0.864	0.874		0.06	0.7	0.17	0.26	0.24
hh	V109454	KK	1		1.466		0.755	0.803	0.826	0.848	0.848		0.06	0.4	0.21	0.41	0.25
hpo	B27661	VALIUM10	1		0.3556		0.719	0.762	0.785	0.814	0.814		0.4	0.22	0.22	0.18	0.14
inv	B41675	VALIUM20	1		0.3255		0.761	0.807	0.815	0.837	0.837		0.21	0.21	0.49	0.43	0.37
kay	B33379	VALIUM20	1		0.4534		0.785	0.825	0.836	0.852	0.852		0.28	0.64	0.08	0.07	0.3
kn	B31916	VALIUM10	1		0.3931		0.794	0.826	0.833	0.86	0.86		0.64	0.28	0.11	0.11	0.28
kni	B27259	GD, VALIUM10	1		0.3592		0.755	0.804	0.815	0.844	0.844		0.08	0.39	0.31	0.54	0.03
lea	B34589	VALIUM20	1		0.2912		0.683	0.724	0.738	0.765	0.765		0.06	0.56	0.09	0.04	0.24
luna	B27084	VALIUM10	1		0.3695		0.84	0.869	0.872	0.886	0.886		0.18	0.75	0.2	0.38	0.08
mats	B29567	VALIUM10	1		3.5887		0.864	0.889	0.895	0.9	0.902		0.58	0.58	0.2	0.15	0.19
neur	V108239	KK	1		2.4309		0.765	0.818	0.832	0.851	0.851		0.45	0.24	0.14	0.21	0.46
nmo	B25793	VALIUM10	1		2.0873		0.922	0.938	0.943	0.954	0.956		0.31	0.81	0.35	0.29	0.15
pnt	B31936	VALIUM10	1		0.9325		0.83	0.855	0.859	0.884	0.884		0.28	0.69	0.03	0.39	0.09
ptc	B28795	VALIUM10	1		1.9546		0.804	0.85	0.867	0.877	0.896		0.6	0.19	0.19	0.05	0.47
rho	B28690	VALIUM10	2		0.6139		0.858	0.885	0.888	0.897	0.897		0.42	0.64	0.27	0.24	0.06
sav	B28006	VALIUM10	1		0.5947		0.892	0.914	0.918	0.93	0.93		0.34	0.81	0.01	0.18	0.13
sd	V101497	KK	1		5.3633		0.841	0.863	0.871	0.874	0.876		0.34	0.63	0.37	0.24	0.02
sev	B36778	VALIUM20	1		0.2402		0.571	0.627	0.64	0.676	0.676		0.05	0.19	0.06	0.28	0.25
sgg	V101538	KK	1		1.7731		0.817	0.85	0.869	0.88	0.88		0.51	0.37	0.25	0.17	0.44
shn	B34689	VALIUM20	1		0.7674		0.762	0.803	0.814	0.835	0.842		0.07	0.42	0.09	0.6	0.08
sls	B31539	VALIUM1	1		0.5182		0.811	0.842	0.863	0.879	0.879		0.72	0.33	0.05	0.14	0.22
sog	V105853	KK	1		0.8503		0.756	0.786	0.801	0.806	0.814		0.53	0.17	0.36	0.18	0.04
spi	B28387	VALIUM10	1		0.4719		0.797	0.827	0.848	0.857	0.857		0.23	0.37	0.57	0.11	0.37
stan	B35050	VALIUM20	1		0.2999		0.76	0.803	0.821	0.832	0.832		0.2	0.44	0.52	0.16	0.03
stg	B29556	VALIUM10	1		1.0297		0.839	0.872	0.877	0.895	0.896		0.25	0.54	0.35	0.48	0.09
tai	B32885	VALIUM20	1		0.4654		0.869	0.894	0.899	0.904	0.904		0.71	0.17	0.56	0.09	0.01
tmod	B41718	VALIUM20	1		0.6584		0.783	0.812	0.827	0.848	0.848		0.2	0.49	0.1	0.6	0.13
trh	V101509	KK	1		0.8179		0.731	0.772	0.787	0.819	0.819		0.53	0.15	0.11	0.12	0.43
tx	B34792	VALIUM20	1		0.9684		0.886	0.911	0.918	0.926	0.926		0.06	0.74	0.53	0.01	0.18
upd1	V7810	GD	1		0.2858		0.795	0.833	0.844	0.859	0.859		0.36	0.12	0.65	0.28	0
vg	V16896	GD	1		2.5051		0.605	0.657	0.676	0.7	0.7		0.44	0.05	0.07	0.02	0
vn	V109437	KK	1		1.2207		0.738	0.771	0.78	0.802	0.802		0.07	0.55	0.02	0.2	0.09
wg	B33902	VALIUM20	1		1.6659		0.737	0.777	0.784	0.811	0.811		0.35	0.58	0.01	0.12	0.19
wts	B27662	VALIUM10	1		0.9344		0.87	0.894	0.898	0.91	0.921		0.36	0.69	0.38	0.08	0.22
yki	B34067	VALIUM20	1		1.8695		0.671	0.706	0.732	0.747	0.759		0.25	0.37	0.29	0.38	0.05
Key to S5 File.
Gene	gene targeted for knockdown
Stock number	Prefix B=TRiP project, Bloomington stock number. Prefix V=Vienna Drosophila RNAi Center stock number.
Vector	Vector used for insertion of RNAi
Expts.	Number of knockdown experiments. If more than one experiment, then the vector is the average of the effects.
Effect size	Length of the vector of shape effects on the wing at a mifepristone concentration of 1.0 µM mifepristone.
Quantiles	Quantiles for the maximum correlation of 580 random MANOVA-estimated SNP vectors. Estimated from 1,000 sets of 580 random vectors.
Correlation	Vector correlations between the dictionary vector and the first 5 PC axes of the among-DGRP line variance matrix (File S2).
